# Supplementary material for: Rational design and fabrication of sulfur-doped porous graphene with enhanced performance as a counter electrode in dye-sensitized solar cells
Source: Royal Society of Chemistry journal article supplement (doi:10.1039/c6ta09505d), 2016-12-20
Supplement: c6ta09505d1.pdf [file c6ta09505d1.pdf]

## Supporting Information

### **Rational design and fabrication of sulfur-doped porous graphene with enhanced performance as counter electrode in dye-sensitized solar cells**

*Xiangtong Meng,<sup>‡</sup> Chang Yu,<sup>‡</sup> Xuedan Song, Zhiqiang Liu, Bing Lu, Ce Hao, and Jieshan Qiu\**

State Key Lab of Fine Chemicals, Liaoning Key Lab for Energy Materials and Chemical Engineering, PSU-DUT Joint Center for Energy Research, Dalian University of Technology, Dalian 116024, China.

E-mail: jqiu@dlut.edu.cn

<sup>‡</sup> These authors contributed equally to this work.

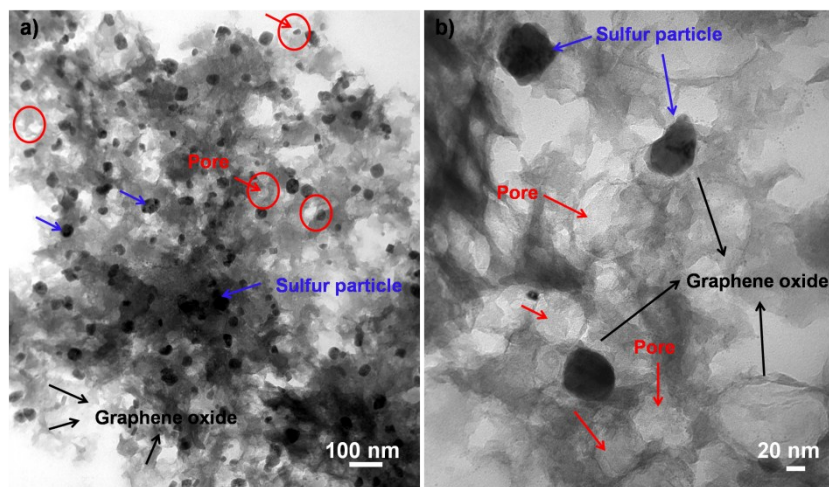

**Fig. S1.** TEM images of the composites made of GO and sulfur treated by ball milling.

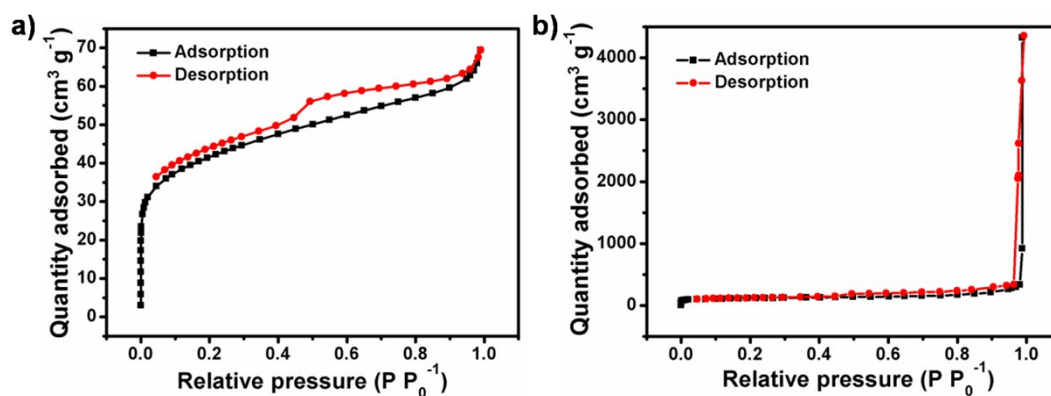

**Fig. S2.** Nitrogen adsorption–desorption isotherms of a) G and b) SPG.

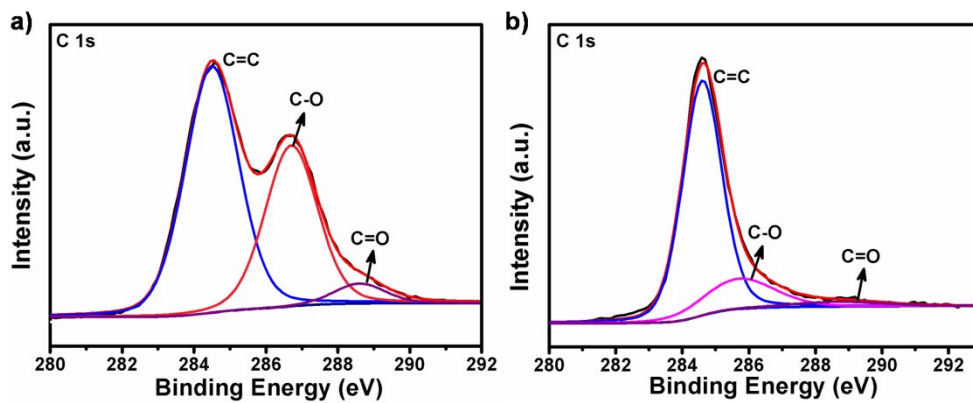

**Fig. S3.** High resolution C1s XPS spectra of a) GO and b) G.

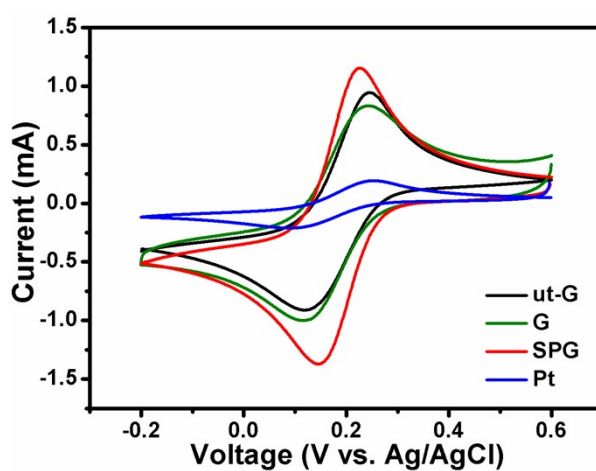

**Fig. S4.** CV curves of ut-G, G, SPG, and Pt CE in  $5 \times 10^{-3}$  M  $K_3Fe(CN)_6/0.1$  M KCl solution, scan rate:  $50 \text{ mV s}^{-1}$ .

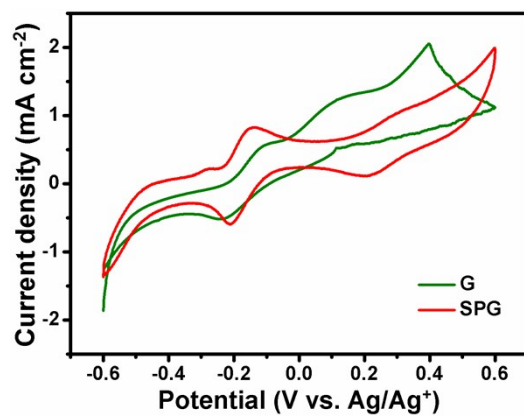

**Fig. S5.** CV curves of G and SPG CEs, scan rate: 5mV s<sup>-1</sup>.

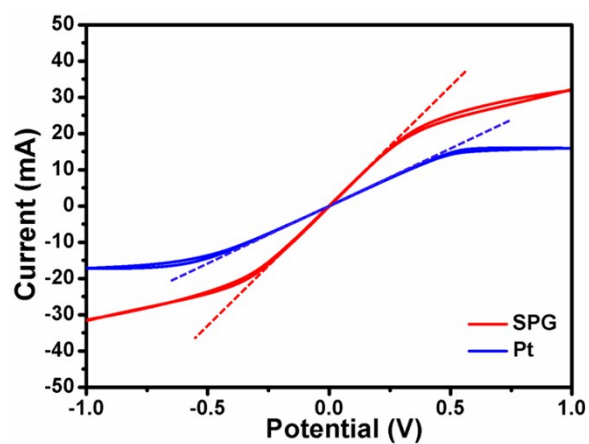

**Fig. S6.** CV curves of dummy cells with I<sub>3</sub><sup>-</sup>/I<sup>-</sup> in acetonitrile solution based on SPG and Pt CEs, scan rate: 50 mV s<sup>-1</sup>.

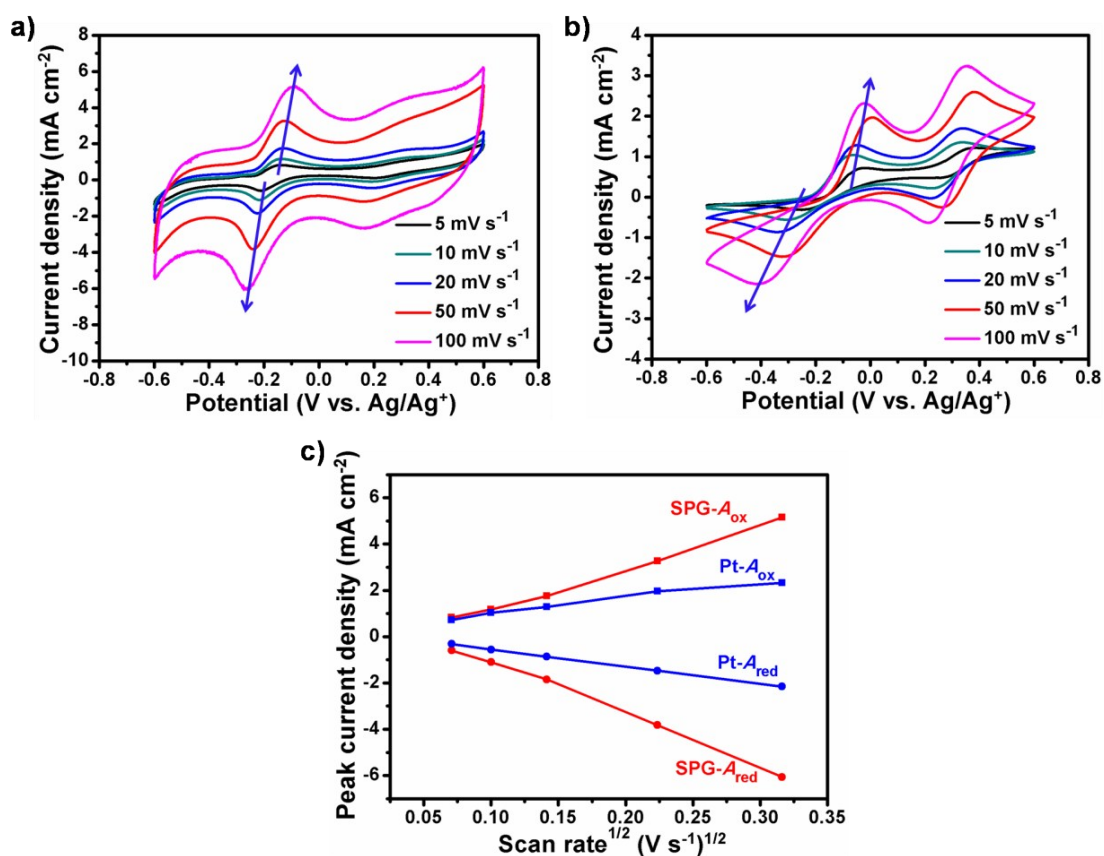

**Fig. S7.** CV curves of a) SPG CE and b) Pt CE at various scan rates. c) Relationship between the peak current densities for redox reaction of  $\text{I}_3^-/\text{I}^-$  and the square root of scan rates for SPG and Pt CEs.

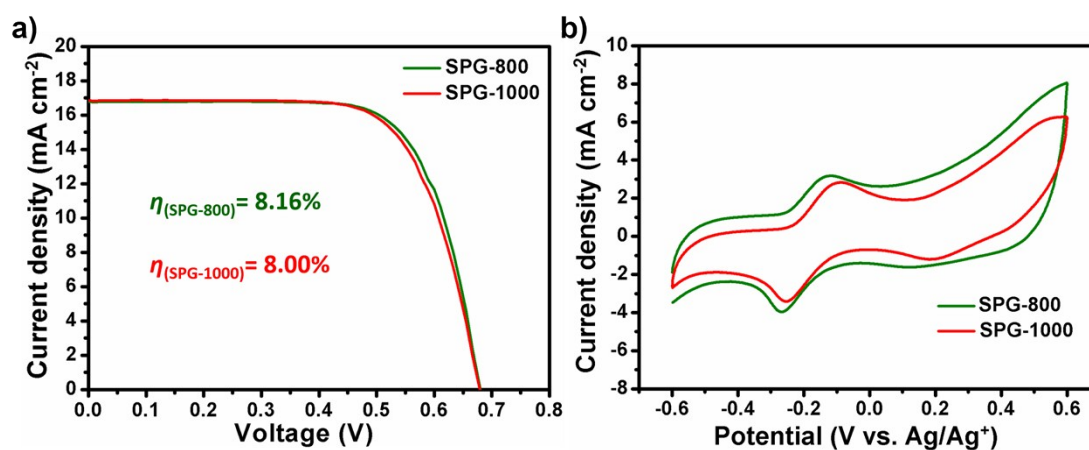

**Fig. S8.** a)  $J$ - $V$  curves and b) CV results of DSSCs with SPG CEs annealed at different temperature.

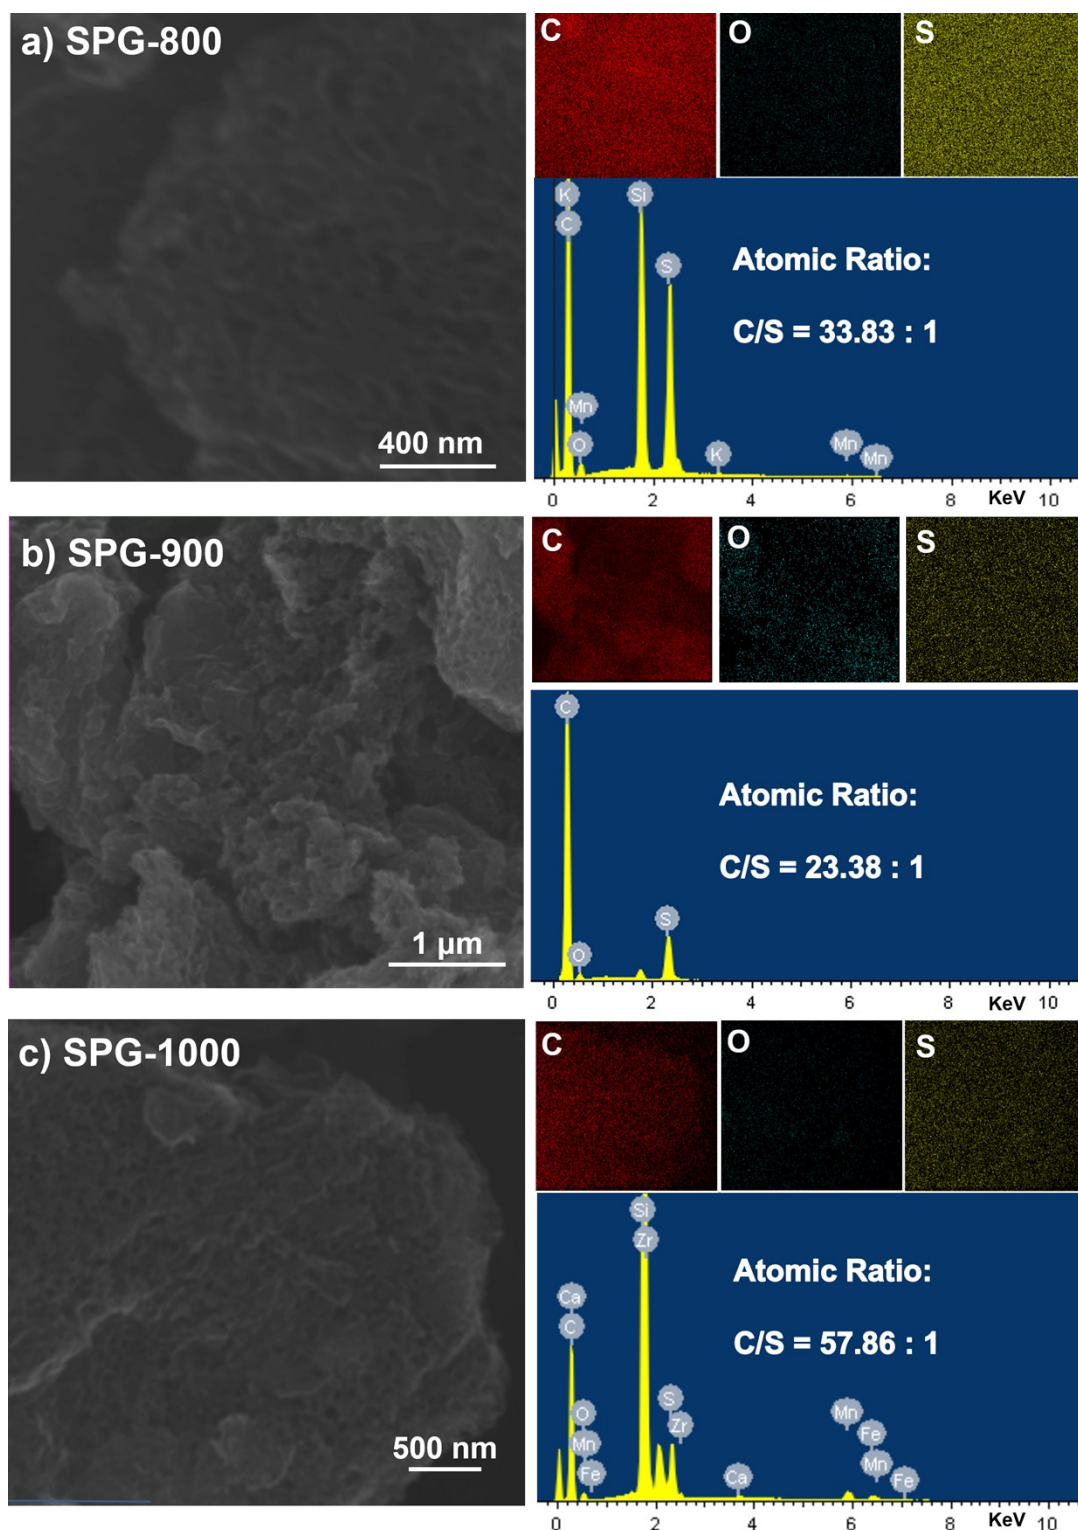

**Fig. S9.** SEM images and corresponding EDS mappings for a) SPG-800, b) SPG-900, and c) SPG-1000.

**Table S1.** The chemical compositions of as-made samples measured via element analysis.

| Samples | GO <sup>a</sup> | GO <sup>b</sup> | G     | SPG   |
|---------|-----------------|-----------------|-------|-------|
| C       | 44.25           | 55.44           | 79.28 | 77.54 |
| S       | 1.14            | 1.12            | 0.53  | 11.48 |
| O       | 51.06           | 40.89           | 18.65 | 10.13 |
| N       | 0.37            | 0.46            | 0.66  | 0.42  |
| H       | 3.18            | 2.09            | 0.88  | 0.43  |

a: GO before ball milling treatment, b: GO after ball milling treatment.

**Table S2.** The atomic ratios of different S species for SPG derived from XPS analysis.

| Type                 | Thiol-S (-S- | Thiophene-S       |                   | Sulphone-S (-          |
|----------------------|--------------|-------------------|-------------------|------------------------|
|                      | H)           | 2p <sub>3/2</sub> | 2p <sub>1/2</sub> | C-SO <sub>2</sub> -C-) |
| Area                 | 448.90       | 6665.72           | 4010.60           | 1089.48                |
| Atomic ratio (at. %) | 3.68         | 54.57             | 32.83             | 8.92                   |

---

**Table S3.** Calculated electroactive surface areas ( $S_e$ ) of different counter electrodes\*

| CEs                      | G     | SPG   | Pt    |
|--------------------------|-------|-------|-------|
| $S_e$ (cm <sup>2</sup> ) | 1.597 | 2.189 | 0.337 |

\*The tested area is 0.25 cm<sup>2</sup> (0.5×0.5 cm<sup>2</sup>), and the electroactive surface area was calculated using the Randles-Sevcik equation:

$$A = \frac{I_{\text{peak}}}{2.69 \times 10^5 \times n^{3/2} \times D^{1/2} \times V^{1/2} \times C}$$

Where,  $A$  is the electroactive surface area (cm<sup>2</sup>),  $I_{\text{peak}}$  is the peak current (A),  $n$  is the electron transfer number, here,  $n=1$ ,  $D$  is the diffusion coefficient of the solute, and

$D = 4.34 \times 10^{-6}$  (cm<sup>2</sup> s<sup>-1</sup>),  $V$  is the scan rate (V s<sup>-1</sup>), and  $V=0.05$  V s<sup>-1</sup>,  $C$  is the concentration (mol mL<sup>-1</sup>).



---

**Table S4.** Electrochemical parameters for SPG and Pt CEs.

| Samples | $E_{pp}$ (V) | $R_s$ ( $\Omega$ cm <sup>2</sup> ) | $R_{ct}$ ( $\Omega$ cm <sup>2</sup> ) | $Z_N$ ( $\Omega$ cm <sup>2</sup> ) | $Z_{pore}$ ( $\Omega$ cm <sup>2</sup> ) |
|---------|--------------|------------------------------------|---------------------------------------|------------------------------------|-----------------------------------------|
| SPG     | 0.12         | 1.78                               | 0.10                                  | 0.60                               | 0.24                                    |
| Pt      | 0.32         | 3.97                               | 1.14                                  | 0.44                               | \                                       |

**Table S5.** The ionization energy ( $E_i$ ) for five kinds of simulated graphene slabs.

| Species                         | Graphene | Thiol-S | Thiophene-S | Sulfone-S |
|---------------------------------|----------|---------|-------------|-----------|
| $E_i$ (kcal mol <sup>-1</sup> ) | 130.29   | 128.34  | 128.21      | 125.10    |
